# Supplementary material
Source: MDPI journal article supplement (https://www.mdpi.com/1424-2818/15/12/1202)
Supplement: s1 [file s1]

**Supplementary Materials S2.** The top 26 most popular (highest use frequency) packages in the eight main biodiversity conservation journals

| Order | Package      | Package Description                                                                              | Maintainer and email                                     | Release Date |
|-------|--------------|--------------------------------------------------------------------------------------------------|----------------------------------------------------------|--------------|
| 1     | vegan        | Community Ecology Package                                                                        | Jari Oksanen<br>jari.oksanen@oulu.fi                     | 2001-09-06   |
| 2     | lme4         | Linear Mixed-Effects Models using 'Eigen' and S4                                                 | Ben Bolker<br>bbolker+lme4@gmail.com                     | 2003-06-25   |
| 3     | MuMIn        | Multi-Model Inference                                                                            | Kamil Bartoń<br>kamil.barton@go2.pl                      | 2010-05-28   |
| 4     | nlme         | Linear and Nonlinear Mixed Effects Models                                                        | R-core<br>R-core@R-project.org                           | 1999-11-23   |
| 5     | mgcv         | Mixed GAM Computation Vehicle with Automatic Smoothness Estimation                               | Simon Wood<br>simon.wood@r-project.org                   | 2000-10-04   |
| 6     | raster       | Reading, writing, manipulating, analyzing and modeling of spatial data                           | Robert J. Hijmans<br>r.hijmans@gmail.com                 | 2010-03-20   |
| 7     | MASS         | Support Functions and Datasets for Venables and Ripley's MASS                                    | Brian Ripley<br>ripley@stats.ox.ac.uk                    | 2009-05-08   |
| 8     | ggplot2      | Create Elegant Data Visualisations Using the Grammar of Graphics                                 | Thomas Lin Pedersen<br>thomas.pedersen@posit.co          | 2007-06-10   |
| 9     | car          | Companion to Applied Regression                                                                  | John Fox<br>jfox@mcmaster.ca                             | 2001-05-01   |
| 10    | dismo        | Methods for species distribution modeling                                                        | Robert J. Hijmans<br>r.hijmans@gmail.com                 | 2010-07-26   |
| 11    | ape          | Analyses of Phylogenetics and Evolution                                                          | Emmanuel Paradis<br>Emmanuel.Paradis@ird.fr              | 2002-08-31   |
| 12    | multcomp     | Simultaneous Inference in General Parametric Models                                              | Torsten Hothorn<br>Torsten.Hothorn@R-project.org         | 2002-06-20   |
| 13    | picante      | Integrating Phylogenies and Ecology, community phylogenetic and trait diversity                  | Steven W. Kembel<br>steve.kembel@gmail.com               | 2008-06-03   |
| 14    | ade4         | Analysis of Ecological Data : Exploratory and Euclidean Methods in Environmental Sciences        | Aur lie Siberchicot<br>aurelie.siberchicot@univ-lyon1.fr | 2002-12-10   |
| 15    | randomForest | Classification and regression based on a forest of trees using random inputs                     | Andy Liaw<br>andy_liaw@merck.com                         | 2002-04-01   |
| 16    | FD           | Measuring Functional Diversity (FD) from Multiple Traits, and Other Tools for Functional Ecology | Etienne Lalibert <br>etiennelaliberte@gmail.com          | 2009-04-16   |

|    |            |                                                                                                   |                                                        |            |
|----|------------|---------------------------------------------------------------------------------------------------|--------------------------------------------------------|------------|
| 17 | glmmTMB    | Fit linear and generalized linear mixed models with various extensions, including zero-inflation. | Mollie Brooks<br>molliecbrooks@gmail.com               | 2017-02-20 |
| 18 | biomod2    | Ensemble Platform for Species Distribution Modeling                                               | Maya Gueguen<br>maya.gueguen@univ-grenoble-alpes.fr    | 2012-11-09 |
| 19 | lmerTest   | Tests in Linear Mixed Effects Models                                                              | Rune Haubo Bojesen Christensen<br>Rune.Haubo@gmail.com | 2013-01-26 |
| 20 | betapart   | Partitioning Beta Diversity into Turnover and Nestedness Components                               | Andres Baselga<br>andres.baselga@usc.es                | 2012-05-03 |
| 21 | spdep      | Spatial Dependence: Weighting Schemes, Statistics                                                 | Roger Bivand<br>Roger.Bivand@nhh.no                    | 2002-03-20 |
| 22 | metafor    | Meta-Analysis Package for R                                                                       | Wolfgang Viechtbauer<br>wvb@metafor-project.org        | 2009-06-05 |
| 23 | iNEXT      | Interpolation and Extrapolation for Species Diversity                                             | T. C. Hsieh<br>euler96@gmail.com                       | 2015-06-30 |
| 24 | emmeans    | estimated marginal means (EMMs) for many linear, generalized linear, and mixed models             | Russell V. Lenth<br>russell-lenth@uiowa.edu            | 2017-11-05 |
| 25 | AICcmodavg | Model Selection and Multimodel Inference Based on (Q)AIC(c)                                       | Marc J. Mazerolle<br>marc.mazerolle@sbf.ulaval.ca      | 2009-09-03 |
| 26 | unmarked   | Models for Data from Unmarked Animals                                                             | Ken Kellner<br>contact@kenkellner.com                  | 2010-01-21 |
